# Supplementary material for: The role of acetyltransferases for the temporal-specific accessibility of β-catenin to the myogenic gene locus
Source: PubMed Central journal article supplement (PMC6180044; doi:10.1038/s41598-018-32888-z), 2018-10-10

## **Supplementary Information**

### **The role of acetyltransferases for the temporal-specific accessibility of $\beta$ -catenin to the myogenic gene locus**

**Akiko Suzuki<sup>1,2</sup>, Ryohei Minamide<sup>1,2</sup>, and Junichi Iwata<sup>1,2,3,\*</sup>**

<sup>1</sup>Department of Diagnostic & Biomedical Sciences, The University of Texas Health Science Center at Houston (UTHealth) School of Dentistry, Houston, TX 77054, USA

<sup>2</sup>Center for Craniofacial Research, UTHealth School of Dentistry, Houston, TX 77054, USA

<sup>3</sup>MD Anderson Cancer Center UTHealth Graduate School of Biomedical Sciences, Houston, TX 77054, USA

\*Corresponding author: Junichi.Iwata@uth.tmc.edu

**Supplementary Figure 1.** WNT/ $\beta$ -catenin signaling does not regulate gene expression of *Myog* and *Myh1* during muscle differentiation. Quantitative RT-PCR analysis of gene expression of the indicated genes with vehicle (control) or IWR1-endo in the proliferation and muscle differentiation stages (n=3 each group).

**Supplementary Figure 2.** Failure of CBP binding to the *Ccna2* and *Cdc25c* promoter and KAT2B binding to the *Fermt2* promoter. **(A)** ChIP-qPCR analysis of CBP binding on the *Fermt2* promoter regions. ChIP with IgG at proliferation (Pro) stage (green),  $\alpha$ -CBP antibody at proliferation stage (orange), IgG at myogenic differentiation (Diff) stage (blue), and  $\alpha$ -CBP antibody at myogenic differentiation stage (red) (n=3 each group). NS, not significant. **(B)** ChIP-qPCR analysis of KAT2B binding on the promoter regions of *Ccna2* and *Cdc25c*. ChIP with IgG at proliferation (Pro) stage (green),  $\alpha$ -KAT2B antibody at proliferation stage (orange), IgG at myogenic differentiation (Diff) stage (blue), and  $\alpha$ -KAT2B antibody at myogenic differentiation stage (red) (n=3 each group). NS, not significant. **(C)** ChIP-qPCR analysis of H3K27Ac on the *Fermt2* promoter regions. ChIP with IgG at proliferation (Pro) stage (green),  $\alpha$ -H3K27Ac antibody at proliferation stage (orange), IgG at myogenic differentiation (Diff) stage (blue), and  $\alpha$ -H3K27Ac antibody at myogenic differentiation stage (red) (n=3 each group). NS, not significant. **(D)** ChIP-qPCR analysis of H3K9Ac on the promoter regions of *Ccna2* and *Cdc25c*. ChIP with IgG at proliferation (Pro) stage (green),  $\alpha$ -H3K9Ac antibody at proliferation stage (orange), IgG at myogenic differentiation (Diff) stage (blue), and  $\alpha$ -H3K9Ac antibody at myogenic differentiation stage (red) (n=3 each group). NS, not significant.

**Supplementary Figure 3.** HATs and  $\beta$ -catenin coordinately access the loci of target genes of WNT/ $\beta$ -catenin signaling. **(A)** ChIP-qPCR analysis of KAT2B and  $\beta$ -catenin binding on the *Ccna2* and *Cdc25c* promoter regions with control or *Ctnnb1* siRNA for 24 hours at the proliferation stage. ChIP with IgG with control siRNA (light blue), IgG with *Ctnnb1* siRNA (light blue),  $\alpha$ -KAT2B antibody with control siRNA (light green), and  $\alpha$ -KAT2B antibody with *Ctnnb1* siRNA (light green),  $\alpha$ - $\beta$ -catenin antibody with control siRNA (red), and  $\alpha$ - $\beta$ -catenin antibody with *Ctnnb1* siRNA (red) (n=3 each group). \*\*\*,  $p < 0.001$ . **(B)** ChIP-qPCR analysis of CBP acetylation on the *Fermt2* promoter regions with control or *Ctnnb1* siRNA for 48 hours at the differentiation stage. ChIP with IgG with control siRNA (light blue), IgG with *Ctnnb1* siRNA (light blue),  $\alpha$ -KAT2B antibody with control siRNA (light green), and  $\alpha$ -KAT2B antibody with *Ctnnb1* siRNA (light green),  $\alpha$ - $\beta$ -catenin antibody with control siRNA (red), and  $\alpha$ - $\beta$ -catenin antibody with *Ctnnb1* siRNA (red) (n=3 each group). \*\*\*,  $p < 0.001$ . **(C)** ChIP-qPCR analysis of H3K9Ac on the *Ccna2* and *Cdc25c* promoter regions with control or *Ctnnb1* siRNA for 24 hours at the proliferation stage. ChIP with IgG with control siRNA (green), IgG with *Ctnnb1* siRNA (blue),  $\alpha$ -H3K9Ac antibody with control siRNA (orange), and  $\alpha$ -H3K9Ac antibody with *Ctnnb1* siRNA (red) (n=3 each group). \*\*\*,  $p < 0.001$ . **(D)** ChIP-qPCR analysis of H3K27 acetylation on the *Fermt2* promoter regions with control or *Ctnnb1* siRNA for 48 hours at the differentiation stage. ChIP with IgG with control siRNA (green), IgG with *Ctnnb1* siRNA (blue),  $\alpha$ -H3K27Ac antibody with control siRNA (orange), and  $\alpha$ -H3K27Ac antibody with *Ctnnb1* siRNA (red) (n=3 each group). \*\*\*,  $p < 0.001$ .

**Supplementary Figure 4.** The expression levels of *Kat2b* and *Cbp* have no effect on fate determination in C2C12 cells. **(A)** Quantitative RT-PCR analysis of the indicated genes after treatment with control or *Kat2b* siRNA in the proliferation stage (n=3 each group). **(B)** The

percentage of MyoD-positive cells after treatment with control or *Kat2b* siRNA in the proliferation stage (n=3 each group). (C) Quantitative RT-PCR analysis of the indicated genes after treatment with control or *Cbp* siRNA in the muscle differentiation stages (n=3 each group). (D) BrdU staining after treatment with control or *Cbp* siRNA in the muscle differentiation stages. The graph shows quantification of BrdU-positive cells after treatment with control or *Cbp* siRNA in the muscle differentiation stages (n=3 each group).

**Supplementary Figure 5.** The cell fate is not reversible with the control siRNAs of *Kat2b* and *Cbp* in C2C12 cells. (A) Quantitative RT-PCR analysis of the indicated genes after treatment with control siRNA and control vector (blue bars) or *Kat2b* siRNA and *Cbp* overexpression (red) in the proliferation stage (n=3 each group). NS, not significant. Overexpression vectors for *Cbp* (addgene, #32908) and *Kat2b* (GenScript, #OMu11684) were transfected with Lipofectamine 3000 (Thermofisher), following manufacturer's protocol. (B) Quantitative RT-PCR analysis of the indicated genes after treatment with control siRNA and control vector (blue bars) or *Cbp* siRNA and *Kat2b* overexpression (red bars) in the muscle differentiation stages (n=3 each group). NS, not significant.

**Supplementary Figure 6.** Full-length blots.

**Supplementary Table S1.** Antibodies used in this study.

| <b>Antibody name</b>                | <b>Provider</b>           | <b>Catalog number</b> | <b>Application</b> | <b>Concentration</b> |
|-------------------------------------|---------------------------|-----------------------|--------------------|----------------------|
| Acetyl-Histone H3 (Lys9)            | Cell Signaling Technology | 9649                  | ChIP               | 1:50                 |
| Acetyl-Histone H3 (Lys27)           | Cell Signaling Technology | 8173                  | ChIP               | 1:100                |
| BrdU                                | Abcam                     | ab6321                | IF, IHC            | 1:1000               |
| β-catenin                           | Abcam                     | ab16051               | IP                 | 5 μg                 |
|                                     |                           |                       | IF                 | 1:100                |
| CBP                                 | Cell Signaling Technology | 7389                  | ChIP               | 1:50                 |
|                                     |                           |                       | IF                 | 1:100                |
|                                     |                           |                       | WB                 | 1:1000               |
| CBP                                 | Abcam                     | ab2832                | IP                 | 5 μg                 |
| GAPDH                               | Millipore                 | MAB374                | WB                 | 1:5000               |
| KAT2B                               | Cell Signaling Technology | 3378                  | ChIP               | 1:25                 |
|                                     |                           |                       | IF                 | 1:100                |
|                                     |                           |                       | WB                 | 1:1000               |
| KAT2B                               | Santa Cruz Biotechnology  | sc-13124              | IP                 | 5 μg                 |
| Myh1                                | Sigma-Aldrich             | MY-32                 | IF                 | 1:1000               |
| MyoD1                               | ThermoFisher              | MA5-12902             | IF                 | 1:10                 |
| non-phosphorylated active β-catenin | Cell Signaling Technology | 8814                  | ChIP               | 1:100                |
|                                     |                           |                       | IP                 | 1:100                |
|                                     |                           |                       | IF                 | 1:100                |
|                                     |                           |                       | WB                 | 1:1000               |

**Supplementary Table S2.** Primer pairs used in this study.

| <b>Gene</b>       | <b>Forward primer</b>         | <b>Reverse primer</b>           |
|-------------------|-------------------------------|---------------------------------|
| <i>Cbp</i>        | 5'-GGCTTCTCCGCGAATGACAA-3'    | 5'-GTTTGGACGCAGCATCTGGA-3'      |
| <i>Ccna2</i>      | 5'-TTGCTCCTCTTAAGGACCTTCC-3'  | 5'-CATTTAACCTCCATTTCCCTAAGGT-3' |
| <i>Ccnd3</i>      | 5'-ATACTGGATGCTGGGGTGTG-3'    | 5'-TGCAGAATCAAGGCCAGGAA-3'      |
| <i>Cdc25c</i>     | 5'-TGACGTCTATAGCCCCACC-3'     | 5'-TAAGCGGAGAGGCAGACATC-3'      |
| <i>Cdkn1a/p21</i> | 5'-TAAGGACGTCCCACCTTGCC-3'    | 5'-CGTCTCCGTGACGAAGTCAA-3'      |
| <i>Ciita</i>      | 5'-TGCGTGTGATGGATGTCCAG-3'    | 5'-CCAAAGGGGATAGTGGGTGTC-3'     |
| <i>Csrp2bp</i>    | 5'-CCGTCAAGTTCATAAGCCGAG-3'   | 5'-TCAGGGACGAGAAGTCGATCA-3'     |
| <i>Esco1</i>      | 5'-ATGAGTCTGAATTTGGAATGCGA-3' | 5'-GTCTTTGTGATCTGCGGTGAA-3'     |
| <i>Esco2</i>      | 5'-GACCTATAAGCCAGTTGTGGAC-3'  | 5'-TCCGCCTTGGAGTGTAACCTG-3'     |
| <i>Fermt2</i>     | 5'-GATCACTTTGGAAGGCGGGA-3'    | 5'-GCGCGTACTGCTTCTCGTTA-3'      |
| <i>Hat1</i>       | 5'-AAGTGTAACACCAACACAGCA-3'   | 5'-CGAAAGCAGTTTCATCATCCCC-3'    |
| <i>Kat2a</i>      | 5'-AAGGCCAATGAAACCTGCAAG-3'   | 5'-CTCACAGCTACGGCACAACCTC-3'    |
| <i>Kat2b</i>      | 5'-CGGATCGCCGTGAAGAAGG-3'     | 5'-CATTGCATTTACAGGACTCCTCT-3'   |
| <i>Kat5</i>       | 5'-TCCCAGTCCAGATCACACTC-3'    | 5'-ACCTTCCGTTTCGTTGAGCG-3'      |
| <i>Kat6a</i>      | 5'-CCTCGTGCATTGGCTGTTC-3'     | 5'-TCATGGCATTCAAGGTGTTCAT-3'    |
| <i>Kat6b</i>      | 5'-AGAAGAAAAGGGGTCGTAAACG-3'  | 5'-GTGGGAATGCTTTCCTCAGAA-3'     |
| <i>Kat7</i>       | 5'-ATGCCGCGAAGGAAGAGAAAT-3'   | 5'-TCTTGGGAACCTCTGGCTTAGC-3'    |
| <i>Myf5</i>       | 5'-CGGCATGCCTGAATGTAACAG-3'   | 5'-GCTGGACAAGCAATCCAAGC-3'      |
| <i>Myod1</i>      | 5'-TGCTCTGATGGCATGATGGATT-3'  | 5'-AGATGCGCTCCACTGTGCTG-3'      |
| <i>Myog</i>       | 5'-TCCCAACCCAGGAGCTCATT-3'    | 5'-AGTTGGGCATGGTTTCGTCT-3'      |
| <i>Myh1</i>       | 5'-CGGTGCGAAGTTGCATCCCTA-3'   | 5'-TTACAGTAGTTCCGCCTTCGG-3'     |
| <i>p300</i>       | 5'-TTCAGCCAAGCGGCCTAAA-3'     | 5'-CGCCACCATTGGTTAGTCCC-3'      |
| <i>Gapdh</i>      | 5'-AACTTTGGCATTGGAAGG-3'      | 5'-ACACATTGGGGGTAGGAACA-3'      |

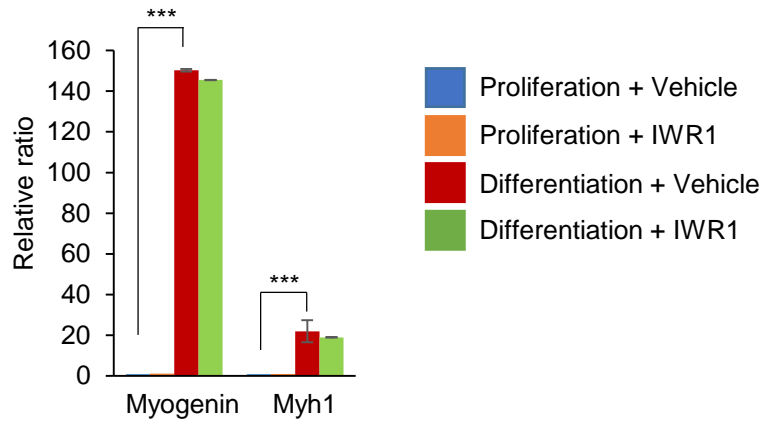

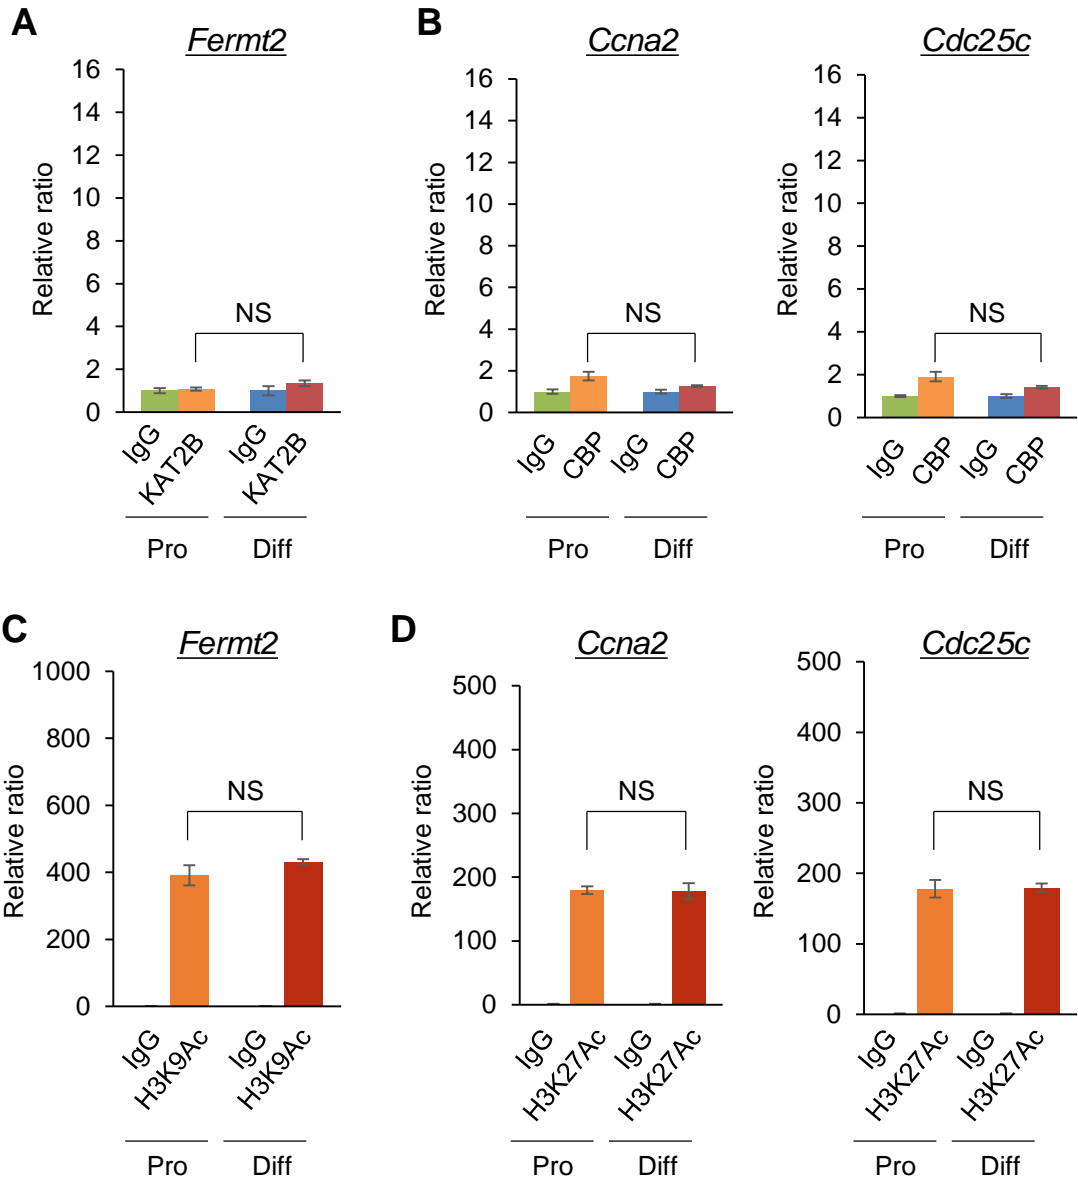



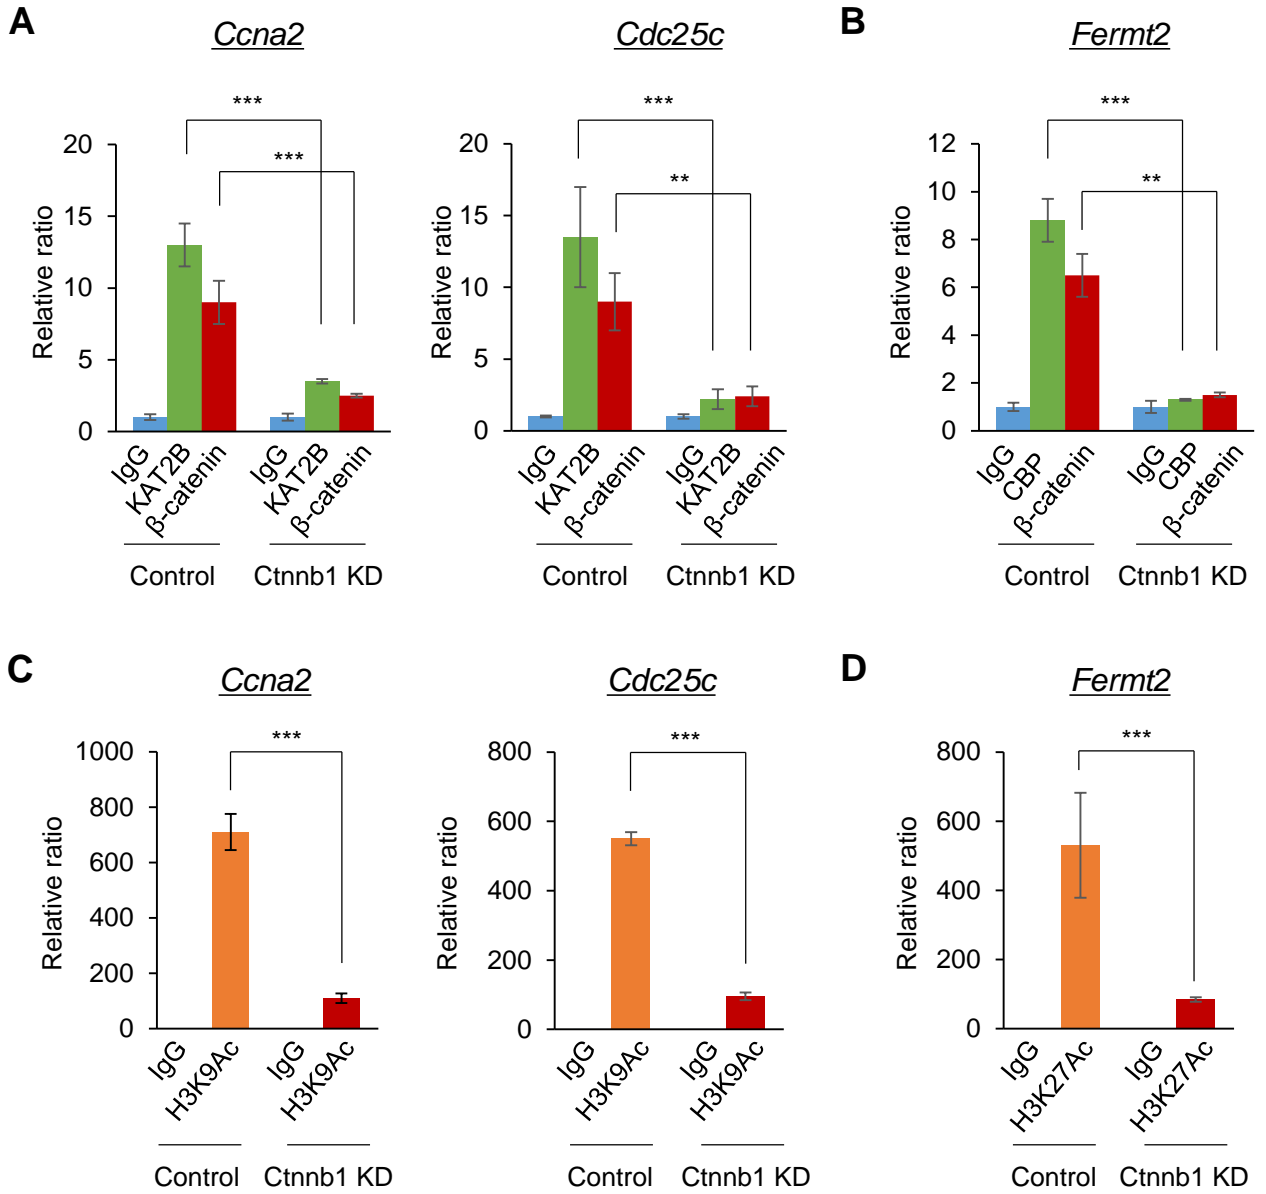

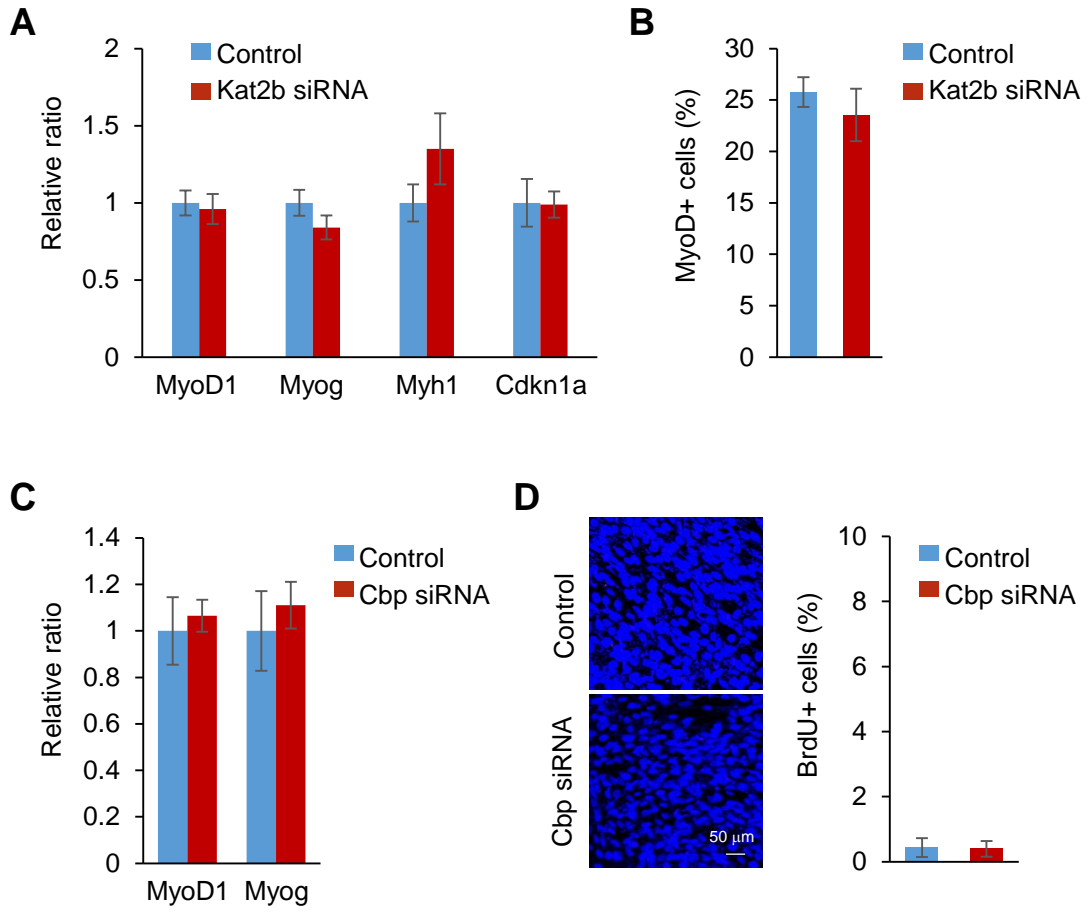

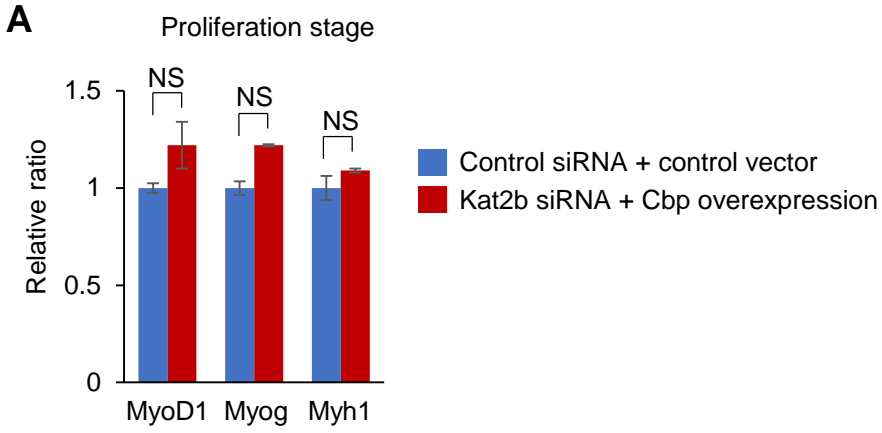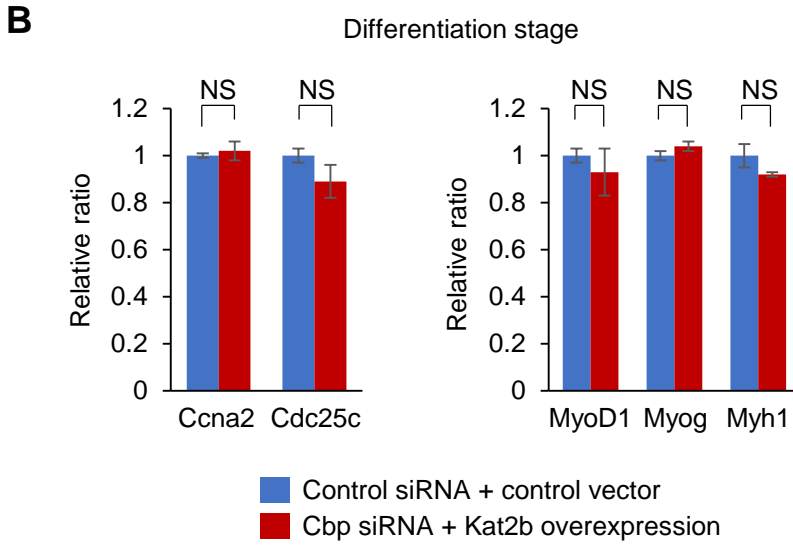

Fig.2B

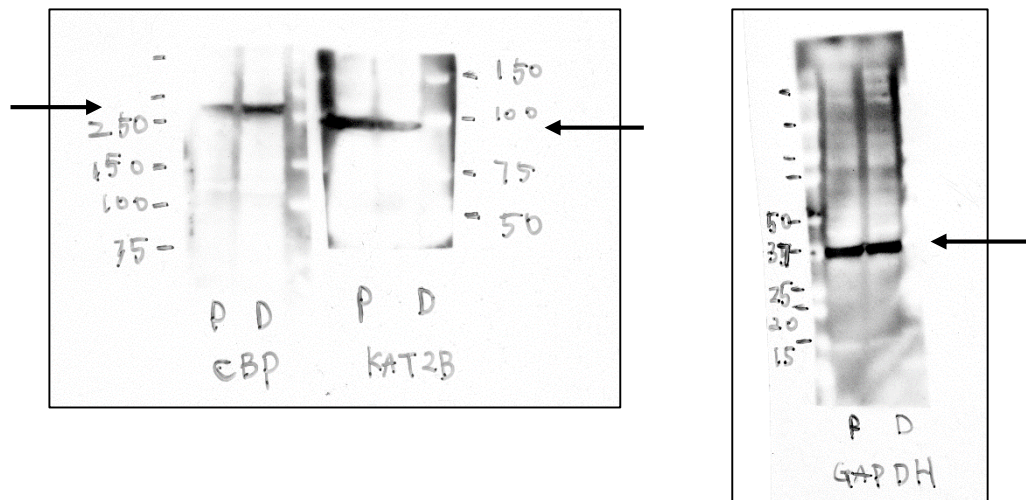

Fig.3E

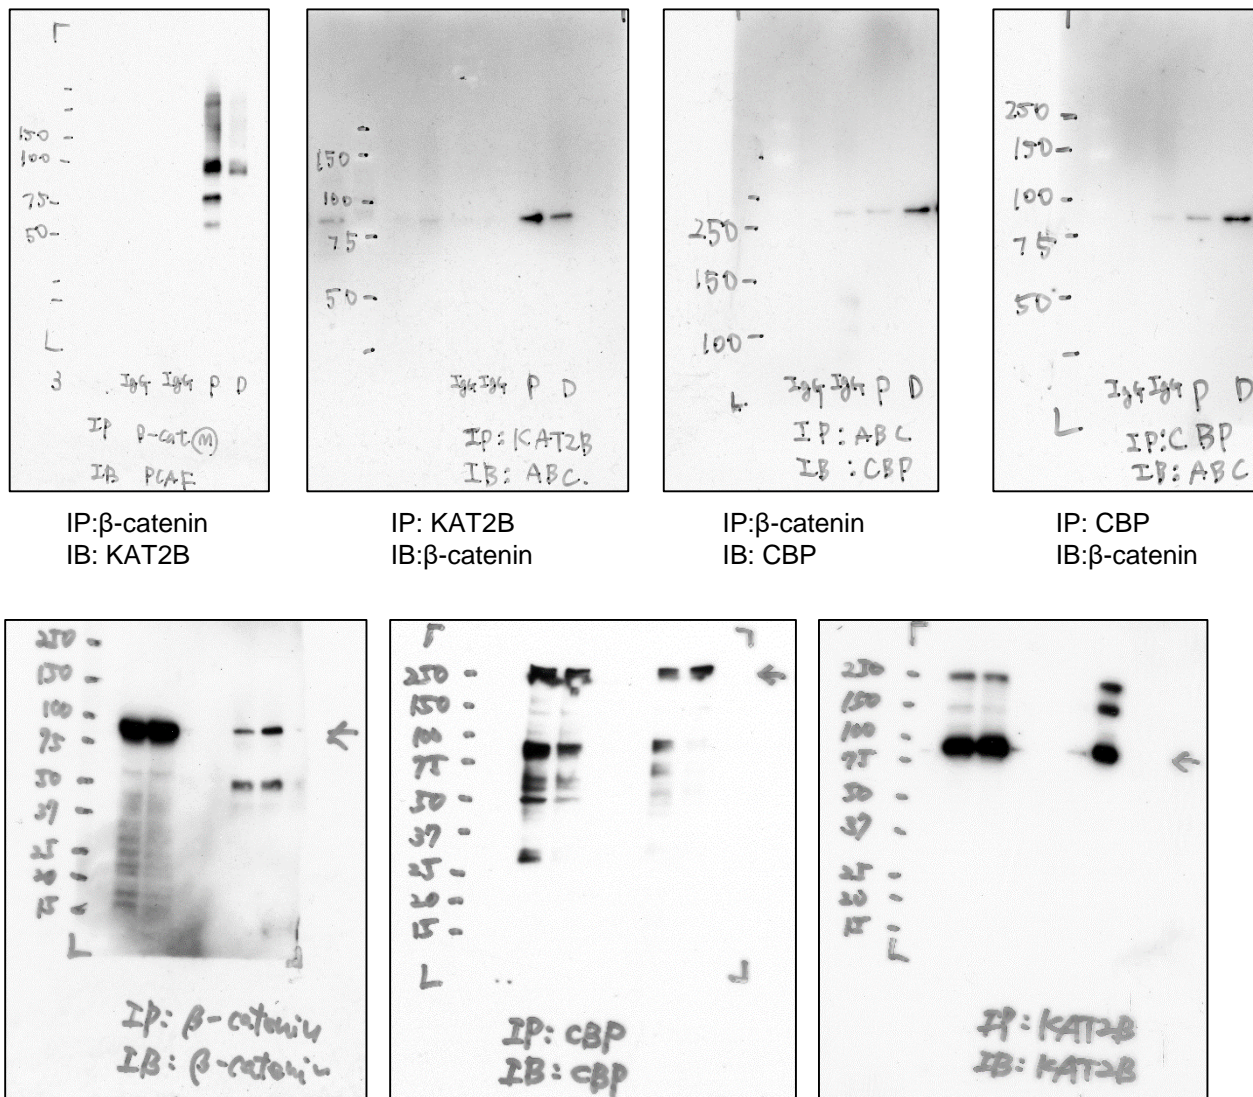

Supplement: 41598_2018_32888_MOESM1_ESM.pdf [file 41598_2018_32888_MOESM1_ESM.pdf]
